# Supplementary material
Source: publisher figshare collection journal article supplement (https://tandf.figshare.com/ndownloader/files/21729834)
Supplement: Supplementary file 1 [file 21729834]

**Supplementary Table S1: Search Strategies (PubMed)**

1. Sedentary behavior
2. Sedentary behaviour
3. Sedentary lifestyle
4. Physical inactivity
5. 1 or 2 or 3 or 4
6. Interventions
7. Strategies
8. Sedentary interventions
9. Breaking up sitting time
10. 5 or 6 or 7 or 8
11. 5 AND 10
12. Older adults
13. Elderly
14. Seniors
15. Aged
16. 12 OR 13 OR 14 OR 15
17. 11 AND 16
18. Limit 16 to English language

**Supplementary Table S2: Summary of Studies by Study Design**

| First Author, Year, Country              | Study Design, Sample size, mean age                                                                                                        | Setting and length of intervention                                                                      | SB Study Objective                                                                                                                                     | SB Intervention components                                                                             | Intervention delivery strategies                                                                                                             | Format                                               | Theory / Model used             | Outcomes to measure SB                                           | Results as described by authors                                                                                                                                                                                                                                                                                                                                                                                                 |
|------------------------------------------|--------------------------------------------------------------------------------------------------------------------------------------------|---------------------------------------------------------------------------------------------------------|--------------------------------------------------------------------------------------------------------------------------------------------------------|--------------------------------------------------------------------------------------------------------|----------------------------------------------------------------------------------------------------------------------------------------------|------------------------------------------------------|---------------------------------|------------------------------------------------------------------|---------------------------------------------------------------------------------------------------------------------------------------------------------------------------------------------------------------------------------------------------------------------------------------------------------------------------------------------------------------------------------------------------------------------------------|
| Baronne Gibbs [40], 2017, Pittsburg, USA | RCT, N= 38, age = 68.5<br><br>Eligibility = >60 years and physically inactive (self-report)                                                | Community adults (working and retired), 12 weeks                                                        | To compare the effects of 2 self-monitoring interventions (SITLESS and Get Active): to decrease SB and increase MVPA                                   | Goal attainment (reduce SB by 1 hour)<br>Activity monitoring<br>Education                              | Motivational Interviewing, Instruction, Information goal setting, problem solving, self-monitoring through phone app, consultations coaching | Individual in-person and telephone consultations     | Not reported                    | Sensewear pro arm band accelerometer<br>CHAMPS                   | Negative<br>No statistically significant change in self-reported SB for Sit less group (p=0.595) or Get Active Group (p=0.495)<br>Self-reported MVPA increased by 45 min/week (p=0.034) and objectively measured MVPA did not increase significantly (p=0.358) for Sit Less Group<br>Self-reported MVPA increased by 225 min/day (p=0.008) and objectively measured MVPA increased by 67 min/week (p=0.02) for Get Active Group |
| Bonnefoy [36], 2012, France              | RCT, N=102, age = 84<br><br>Eligibility = >80 years and frail                                                                              | Community older adults living at home and receiving assistance from a home helper, 4-month intervention | To evaluate the effectiveness of a multi-component home program (prescribed by PT) for mobility delivered by home helper change on health outcomes     | Physical activity (Exercise program)                                                                   | Instruction (written and verbal) coaching by HH                                                                                              | In-person                                            | Not reported                    | PASE                                                             | Negative<br>No change in SB (P=0.42).<br>Improvement in maximum walking distance and walking time for good compliers (p=0.007; p=0.004)<br>This study demonstrated that just increasing PA does not change SB                                                                                                                                                                                                                   |
| Lee [45], 2013, Australia                | RCT, 2 arms, N= 375, age = 66<br><br>Recruited 45 years and older Insufficiently PA (participate in <30 min MVPA for at least 5 days/week) | Community-dwelling adults intervention carried out in home, 6-month intervention                        | To determine the effectiveness of a low-cost, accessible, physical activity and nutrition program (PANS) on physical activity and nutrition behaviours | Education<br>Physical Activity                                                                         | Instruction<br>Information booklet<br>Self-monitoring<br>Goal setting<br>Resistance band and pedometer given                                 | Telephone, email and written material                | SCT<br>Precede<br>Proceed Model | IPAQ sitting                                                     | Positive: PANS Intervention group had statistically significant reduction in mean sitting time (355 min/week decrease in sitting time; p < 0.001) relative to control                                                                                                                                                                                                                                                           |
| Fanning [39], 2016, US                   | RCT, N=307, age = 70<br><br>Eligibility = >65 and low active                                                                               | Community-dwelling adults >60, 6-month intervention                                                     | To evaluate the effectiveness of a home-based DVD exercise program on SB to a wait-list control                                                        | Physical Activity (multi-component DVD home exercise program)<br>Education (healthy living, PA and SB) | Instruction, Information, Goal setting, Self-monitoring (exercise logs), Feedback on performance from research staff                         | Self-administered DVD                                | SCT and ecological model        | Actigraph Accelerometer (sitting time and sitting breaks)        | Positive: statistically significant Increase in number of sitting breaks (p=0.02) (4 more breaks/day at 12-month follow-up)<br>No change in sitting time (p=0.048)                                                                                                                                                                                                                                                              |
| Harris [31], 2017, UK                    | RCT, 3 arms, N= 1023, age = 45 – 75 (average not reported)<br><br>Eligibility = 45 – 65 and no                                             | Primary care setting with community-dwelling adults, 3-month intervention                               | To compare a primary care pedometer-based walking intervention (PACE-UP) to a nurse consultation intervention and                                      | Education<br>Physical activity (walking program with pedometer)                                        | Instruction<br>Information (written material in PACE-UP patient handbook on benefits of PA and risks of SB)<br>Goal setting                  | Individually administered<br>Face to face individual | Michie's BCT                    | Actigraph Accelerometer<br>Followed up at 3 months and 12 months | Negative: All 3 groups had no significant reduction in SB. Both interventions had statistically significant improvements in step counts and MVPA                                                                                                                                                                                                                                                                                |

|                             |                                                                                                                                                                                              |                                                                                    |                                                                                                                                                                                                                                             |                                                               |                                                                                                                                                                                                 |                                                                                                   |                                                                                          |                                                                     |                                                                                                                                                                                                                                                                                                          |
|-----------------------------|----------------------------------------------------------------------------------------------------------------------------------------------------------------------------------------------|------------------------------------------------------------------------------------|---------------------------------------------------------------------------------------------------------------------------------------------------------------------------------------------------------------------------------------------|---------------------------------------------------------------|-------------------------------------------------------------------------------------------------------------------------------------------------------------------------------------------------|---------------------------------------------------------------------------------------------------|------------------------------------------------------------------------------------------|---------------------------------------------------------------------|----------------------------------------------------------------------------------------------------------------------------------------------------------------------------------------------------------------------------------------------------------------------------------------------------------|
|                             | restriction to SB or PA                                                                                                                                                                      |                                                                                    | control on PA levels                                                                                                                                                                                                                        |                                                               | Self-monitoring with pedometer and diary, Consultation                                                                                                                                          |                                                                                                   |                                                                                          |                                                                     |                                                                                                                                                                                                                                                                                                          |
| Kerr [42], 2016, US         | RCT Pilot trial, N = 30, age = 61<br><br>Recruited adults 50 – 70 years old<br>Sedentary (8 hours sitting/day or more)                                                                       | Community-dwelling older adults, 14-day intervention                               | To compare 2 interventions to decrease SB using goal setting (sitting time vs. sit to stand transitions)                                                                                                                                    | Education (benefits of PA and risks of SB)<br>Goal Attainment | Health coaching<br>Instruction<br>Information<br>Goal setting<br>Self-monitoring (accelerometer, pedometer trackers, tick sheets),<br>Action Planning, Problem solving, Individual consultation | Face to face<br>Written material<br>Emails<br>Phone calls                                         | Social Ecological Model                                                                  | Active Pal inclinometer (sitting time and sit-to-stand transitions) | Positive: sitting time intervention had significant reduction in sitting time (130 min/day decrease) but no change in sit to stand transitions. Sit to stand intervention had a significant increase in sit-stand transitions (13/day), but no change in sitting time<br>Feasible intervention           |
| King [41], 2016, US         | RCT, 3 arms, N= 95, age = 60<br><br>Recruited ages 45 years and older who were insufficiently active (engage in less than 60 min MVPA/week and self report sitting for 10 hours or more/day) | Community dwelling older adults, 8- week intervention                              | To compare the effectiveness of 3 different behaviour change apps on decreasing SB and increasing PA and compare the PA and SB changes of 3 different behaviour change apps to a control (diet app)                                         | Activity monitoring (mobile app)<br>Education                 | Apps use:<br>Goal setting<br>Problem solving<br>Prompts with Positive reinforcement<br>Feedback in performance<br>Comparative norms<br>Motivational prompts                                     | Accelerometer embedded in app<br>Self-administered                                                | SCT and self-regulation theory, social influence theory, Operant conditioning principles | Accelerometer in smart phone                                        | Positive: No significant reduction in SB in all 3 intervention groups compared to control group. However, social app had statistically significant reduction in SB compared to all other groups. Significant reduction in sitting time in social and affects apps compared to analytic and control apps. |
| Maher [46], 2017, US        | RCT, N= 42, age = 76.9<br><br>Recruited from senior centres<br>Not excluded on SB or PA                                                                                                      | Community dwelling older adults recruited from senior centres, 2-week intervention | To evaluate the feasibility, acceptability, safety, and preliminary efficacy of an intervention that combined video with group discussions to reduce older adults' sedentary behavior through goal setting when compared to a control group | Education                                                     | Goal setting (developing detailed plans and strategies to meet goals)<br>Peer support<br>Information (information on SB and consequences)<br>Action Planning                                    | Videos<br>Group discussion face to face                                                           | HAPA (as above) Dual Process Model                                                       | SBQ (9 item)                                                        | Positive: intervention group reported an average decrease in total SB of 837.8 min/week (119 min/day) (p<0.001) one week following the intervention; no significant reduction in SB for control<br>Weekday SB decreased significantly (p<0.05), however reduction in weekend SB was not significant      |
| Muller [47], 2016, Malaysia | RCT, N=43, age = 63<br><br>Eligibility = 55-70 years and not exercising regularly                                                                                                            | Community-dwelling older adults, 12-week intervention                              | To determine the effectiveness of an exercise booklet and weekly SMS text on PA and maintenance of PA and secondary outcomes (SB)                                                                                                           | Education<br>PA (Exercise program)                            | Instruction<br>Information (written material),<br>Coaching,<br>Motivational interviewing, Prompts                                                                                               | Face to face individual, written material, mobile phone text messages, self-administered exercise | Not described                                                                            | Exercise logs<br>IPAQ sitting                                       | Negative: No significant reduction in SB for intervention group at both time points.<br>SMS text messages significantly improved exercise frequency (p=0.03) at 12 weeks; however, no significant improvement at 24 weeks (after text messages stopped)                                                  |

|                            |                                                                                                                                   |                                                                             |                                                                                                                                                                                                                      |                                                                                                                                       |                                                                                                                                                                                              |                                                                                                   |                                                              |                                        |                                                                                                                                                                                                                                                                                                                                                                                  |
|----------------------------|-----------------------------------------------------------------------------------------------------------------------------------|-----------------------------------------------------------------------------|----------------------------------------------------------------------------------------------------------------------------------------------------------------------------------------------------------------------|---------------------------------------------------------------------------------------------------------------------------------------|----------------------------------------------------------------------------------------------------------------------------------------------------------------------------------------------|---------------------------------------------------------------------------------------------------|--------------------------------------------------------------|----------------------------------------|----------------------------------------------------------------------------------------------------------------------------------------------------------------------------------------------------------------------------------------------------------------------------------------------------------------------------------------------------------------------------------|
| Mutrie [48], 2012, UK      | RCT, N=41, age = 71<br><br>Recruited age 65 years and older and not meeting PA guidelines                                         | Community dwelling adults recruited from primary care, 12-week intervention | To assess the feasibility of a pedometer-based walking programme in combination with PA consultations in Scottish adults                                                                                             | Goal Attainment, Education (benefits of PA and risks of SB, SB strategies) PA (daily walking program) Activity Monitoring             | Consultation, Goal setting (to increase steps by 3000 above initial step count) Information Pedometer self-monitoring, peer support                                                          | Face to face individual and group, self-administered pedometer                                    | SCT, logic model, RE-AIM Framework                           | Active Pal inclinometer, pedometer     | Positive: Intervention group (with pedometer and nurse consultation) showed significant reduction in sitting time (67.5 min/day; p<0.001) compared to control from baseline to week 12. Significance not maintained at 24 weeks. Objectively measured walking time increased during the walking intervention (2119 steps/day; p=0.001) and remained 12 weeks after intervention. |
| Strath [49], 2014          | RCT, N= 114, age = 63<br><br>Recruited 50 – 80 years and walking <8000 steps/day                                                  | Community dwelling adults, 12-week intervention                             | To determine the effectiveness of an intervention that combines pedometer guidance with internet-based motivational messaging on age-related health outcomes                                                         | Activity Monitoring (Pedometer) Education (strategies to decrease SB and increase PA)                                                 | Motivational messages (prompts) Self-monitoring (pedometer), Feedback on performance, Goal setting, Rewards, Barrier identification, Instruction Information Peer support (discussion forum) | Web-based                                                                                         | Self-regulation, behaviour change                            | accelerometer                          | Positive: Significant decrease in overall sedentary time for the entire cohort (all 3 groups averaged 20 min/day decrease in sitting; p=0.04) over the study period but this decrease was not significantly different between groups (P=0.77)                                                                                                                                    |
| Copeland [22], 2017        | Critical Review, age = 60 – 72 years<br><br>Narrative review of 12 studies                                                        | Community dwelling older adults                                             | To determine the validity and reliability of self-report measurement tools, and the consequences of prolonged ST on geriatric-relevant health outcomes and determine the effectiveness of interventions to reduce ST | Education, Physical Activity, Activity Monitoring, Goal Attainment                                                                    | Motivational Interviewing, Instruction, Information goal setting, problem solving, self-monitoring through phone app, consultations coaching, feedback on performance, peer support          | Face to face individual, written material, mobile phone text messages, self-administered exercise | Not described                                                | Accelerometer and self-report measures | Positive: Reducing sedentary behaviour for older adults is feasible                                                                                                                                                                                                                                                                                                              |
| Ball [32], 2017, Australia | Pre-post design, n=80, age = NA<br>Eligibility: comprised 40 – 65 years and does not meet PA guidelines and spends 3/4day sitting | Home/ Community intervention, 4-month intervention                          | To increase PA to 150 min MVPA/week and decrease sitting by 150 min/week through an incentive-based approach                                                                                                         | Reward system based on a point system for good behaviour (points to purchase) Activity monitoring (fit-bit) Education Goal attainment | Motivational interviewing, text message prompts, Instruction, Information, goal setting, self-monitoring with Fitbit), Graded tasks                                                          | Telephone calls and texts, web-based                                                              | Control Theory Self-regulation Contingency Management Theory | IPAQ (sitting time)                    | Positive: decreased sitting time by 3.1 hours/day (ES = 1.35; p<0.001) Leisure time PA increased by 252.5 min/week (ES = 0.61; p<0.001)                                                                                                                                                                                                                                          |
| Britten [50], 2017, UK     | Pre-post design 3 groups stratified by site, (uncontrolled), N= 22, age = 74.8                                                    | Community dwelling adults over 60, 8-week intervention                      | To evaluate the feasibility and impact of a dance program delivered at local community centres to low income older adults on                                                                                         | PA (group exercise with dance steps led by dance artist)                                                                              | Peer support Barrier identification Problem solving/                                                                                                                                         | Group face to face                                                                                | Not reported                                                 | IPAQ Focus groups                      | Positive: decrease in self-reported SB on weekends (105.2 min/week) (t(21) = 1.81, p<0.05 d= 0.20) Significant improvements in physical activity, TUG, Geriatric depression scale and falls efficacy scale                                                                                                                                                                       |

|                                 |                                                                                                                                                 |                                                                                              |                                                                                                                                                                                                                                                                                                   |                                                                                                               |                                                                                                                                                                                                                        |                                                                       |                                                                                          |                                                                                             |                                                                                                                                                                                                                                                                                                                                                                                 |
|---------------------------------|-------------------------------------------------------------------------------------------------------------------------------------------------|----------------------------------------------------------------------------------------------|---------------------------------------------------------------------------------------------------------------------------------------------------------------------------------------------------------------------------------------------------------------------------------------------------|---------------------------------------------------------------------------------------------------------------|------------------------------------------------------------------------------------------------------------------------------------------------------------------------------------------------------------------------|-----------------------------------------------------------------------|------------------------------------------------------------------------------------------|---------------------------------------------------------------------------------------------|---------------------------------------------------------------------------------------------------------------------------------------------------------------------------------------------------------------------------------------------------------------------------------------------------------------------------------------------------------------------------------|
|                                 | Sampling included 60 years and older, not excluded based on PA or SB                                                                            |                                                                                              | physical health outcomes                                                                                                                                                                                                                                                                          |                                                                                                               |                                                                                                                                                                                                                        |                                                                       |                                                                                          |                                                                                             |                                                                                                                                                                                                                                                                                                                                                                                 |
| Fitzsimons [51], 2013, Scotland | Pre-post design, single group Pilot study, N=24, age = 68<br><br>Sampling was 60 years and older, not excluded based on PA or SB                | Community dwelling adults over 60 years, 2- week intervention                                | To evaluate the feasibility of individualized consultation to decrease SB and determine which SBs may be open to change                                                                                                                                                                           | Education Activity monitor (accelerometer)                                                                    | Individualized consultation, Instruction Information, goal setting, self-monitoring with accelerometer, barrier identification/ problem solving, action planning graded tasks, habit formation, habit reversal         | Individual one-on one and self-administered                           | Ecological model                                                                         | Activ Pal inclinometer, sedentary behaviour questionnaire (SBQ)                             | Positive: statistically significant decrease in total objective time spent sitting (24 min/day; p=0.004) and total self-reported sitting time (60 min/week; p<0.005). Increase in total time stepping by 13 min/day (p=0.044)<br>The main modes of sedentary behaviour influenced by the intervention were television viewing and sitting while driving in a car, train or bus. |
| Gardiner [52], 2011, Australia  | Pre-post study design, N=59, age = 74<br><br>Sampling 60 years and older and self-reported TV viewing of 2 or more hours/day                    | Community dwelling older adults with > 2 hours TV time/day, 6-day intervention               | To examine the feasibility of an intervention (Stand up for your health) aimed at decreasing and breaking up sedentary time                                                                                                                                                                       | Education (benefits of PA and risks of SB) Goal attainment (to Stand up and move after 30 minutes of sitting) | Goal setting, barrier identification, feedback (compared to normative data), self-monitoring, Action plan, Instruction (strategies to break up sitting) Information                                                    | Individual one-on one and mailed education and accelerometer feedback | social cognitive theory and behavioral choice theory                                     | Acti-graph accelerometer                                                                    | Positive: Statistically significant decrease in sitting time by 3.2%/day (95% CI= -4.18, -2.14, p<0.001) and increase in number of breaks in a day by 4.0 (95% CI=1.48, 6.52; p<0.003] 4/day (p=0.003). MVPa also significantly improved.                                                                                                                                       |
| Rosenberg [53] 2015, US         | Pre-post design, N= 36, age = 71.4<br><br>Sampling over 60 years with a BMI>27 and self-report and objectively measured sitting of >7 hours/day | Recruited from Primary care clinics – unsure if just community dwelling, 8-week intervention | To examine the feasibility of the TABS intervention (Take active breaks from sitting: decrease total sitting time by 2 hrs/day through more standing/moving and an additional 15 breaks from sitting/day) in older adults with overweight and obesity and determine the impact on health outcomes | Education (Benefits of PA and risks of SB, strategies to decrease SB) Goal attainment                         | Health coaching Motivational interviewing, goal setting (patient specific), performance feedback (graphical feedback charts depicting sitting and standing time), environmental restructuring, Instruction Information | Telephone calls, web-based                                            | SCT                                                                                      | Active Pal accelerometer IPAQ SBQ                                                           | Positive: Objective measures demonstrated statistically significant decrease in sitting time by 27 min/day (3% change) (p=0.04; ES = 0.25), sit to stand increased by 2 transitions/day (not significant) Self-reported weekday sitting time decreased by 1.81 hour/day (P=0.01, ES = 0.66)                                                                                     |
| King [54], 2013, US             | Iterative design before and after Pilot study, 3 arms N=68, age = 60<br>Sampling included: 40 years and older insufficiently                    | Community-dwelling older adults, 8-week intervention                                         | To design, develop and determine the feasibility and effectiveness of 3 different mobile apps (analytically vs. socially vs.                                                                                                                                                                      | Activity monitoring (Mobile Apps) Education                                                                   | Apps use: Goal setting Problem solving Positive reinforcement Avatar game like self-assessment Feedback                                                                                                                | Accelerometer embedded in app Self-administered                       | SCT and self-regulation theory, social influence theory, operant conditioning principles | CHAMPS Australian Sedentary Behaviour Questionnaire Measure of adults sedentary time (MOST) | Positive: All participants had significantly decrease in sitting time. Average decrease in daily minutes of TV time = 29.1m/day.<br>No difference between groups<br>All groups significantly decreased time spent sitting and watching TV (t(58)=2.5, p<0.02). Between group differences not significant (p>0.34).                                                              |

|                             |                                                                                                                                                                                         |                                                                                                           |                                                                                                                                                           |                                                                                      |                                                                                                                                                                                    |                                                                                                                        |                                                   |                                                                                    |                                                                                                                                                                                                                                                                                          |
|-----------------------------|-----------------------------------------------------------------------------------------------------------------------------------------------------------------------------------------|-----------------------------------------------------------------------------------------------------------|-----------------------------------------------------------------------------------------------------------------------------------------------------------|--------------------------------------------------------------------------------------|------------------------------------------------------------------------------------------------------------------------------------------------------------------------------------|------------------------------------------------------------------------------------------------------------------------|---------------------------------------------------|------------------------------------------------------------------------------------|------------------------------------------------------------------------------------------------------------------------------------------------------------------------------------------------------------------------------------------------------------------------------------------|
|                             | physically active (i.e., engaged in less than 60 minutes MVPA per week that increased heart rate, breathing, or perspiration), reported typically sitting for 10 or more hours per day, |                                                                                                           | affectively framed) on behaviour change (decreasing sitting and increasing MVPA) with                                                                     |                                                                                      | Comparative norms<br>Motivational messages (prompts)                                                                                                                               |                                                                                                                        |                                                   |                                                                                    | Affect App had the smallest amount of change with sitting time                                                                                                                                                                                                                           |
| Lewis [55], 2016, Australia | Pre-post study, N=27, age = 69.4<br><br>Sampling included >60 years                                                                                                                     | Community dwelling, intervention carried out in home, 6-week intervention                                 | To determine the feasibility and preliminary effectiveness of a goal-setting, home program intervention (Small Steps) on reducing sedentary behaviour     | Education<br>Goal attainment                                                         | Instruction Information (Work book) personalized goal setting normative feedback, graded tasks (aim to decrease SB by 90 min/day) Self-monitoring (check list) Supportive coaching | Face to face individual sessions in participants home, computer assisted telephone interview, phone calls, independent | Self-determination theory                         | ActivePal accelerometer Multimedia Activity Reall for Parents and Children (MARCA) | Positive: Sitting time was significantly reduced By 51.5 min/day (p=0.006; d=-0.58) And number of bouts of prolonged sitting By 0.8/day (p=0.002; d=-0.7) Self-reported sitting decreased by 96min/day (p<0.001; d=-0.77), however after bonnferoni correction no significant difference |
| Liu [37], 2015, China       | Quasi-experimental pre-post design, N=39, age = 76,<br><br>Recruited from nursing home Not excluded to SB or PA status                                                                  | Residents in Nursing Homes, 6-week intervention                                                           | Examine the effectiveness of an educational program on PA status for residents in a nursing home                                                          | Education<br>Physical Activity                                                       | Goal setting Self-monitoring (pedometer) Instruction Information (Written material- Activity Log book)                                                                             | Face to face group and individual, independent                                                                         | Guided by Go-4 Life (national institute on aging) | IPAQ                                                                               | Positive: Significant improvement in total PA as measured by IPAQ (p<0.01), however not broken down to SB component in IPAQ caution                                                                                                                                                      |
| Matei [43], 2015, UK        | Pre-post design with 2 groups, N= 43, ages = 66.7,<br><br>Sampling 65-75 years Not excluded to SB or PA status                                                                          | Community dwelling older adults recruited from shelter housing and intervention community centres, 4-week | To determine the feasibility of a SB intervention (On your feet Earn your seat) and to determine the effectiveness of replacing SB with all 4 types of PA | Education                                                                            | Instruction Information (written booklet, PA tips) motivational interviewing Self-monitoring (tick sheets) Habit formation Habit reversal Action Planning                          | Written material with tips and strategies                                                                              | Habit Formation Model                             | IPAQ, MOST                                                                         | Positive: Significant reduction in mean sitting time (1056 min/week); p=0.001) only for the second sample of participants (community recruited)                                                                                                                                          |
| Leask [56], 2017, Glasgow   | Qualitative Participatory research, N= 11, age = 74                                                                                                                                     | Community dwelling, 10-month intervention                                                                 | To co-create a tailored intervention for older adults that targets decreasing SB                                                                          | Focus groups of older adults, researchers and exercise experts recommended Education | Review of literature Field notes Video recordings Worksheet tasks                                                                                                                  | Face to face group                                                                                                     | Not reported                                      | Qualitative content analysis                                                       | Positive: Focus groups recommended to include; daily diary, strategies to modify routine, education, self-monitoring and action planning to evaluate change when designing SB interventions for older adults                                                                             |

|                                                 |                                                                                                                                                                                                                                                |                                                                                |                                                                                                                                                                                                                                               |                                                                                                      |                                                                                                                                                                                                                              |                                                                         |                                                                                            |                                                       |                                                                                                                                                                                                                                                                                                                                                                                                                                                                                                                                                                                                                                                                                                                                                                           |
|-------------------------------------------------|------------------------------------------------------------------------------------------------------------------------------------------------------------------------------------------------------------------------------------------------|--------------------------------------------------------------------------------|-----------------------------------------------------------------------------------------------------------------------------------------------------------------------------------------------------------------------------------------------|------------------------------------------------------------------------------------------------------|------------------------------------------------------------------------------------------------------------------------------------------------------------------------------------------------------------------------------|-------------------------------------------------------------------------|--------------------------------------------------------------------------------------------|-------------------------------------------------------|---------------------------------------------------------------------------------------------------------------------------------------------------------------------------------------------------------------------------------------------------------------------------------------------------------------------------------------------------------------------------------------------------------------------------------------------------------------------------------------------------------------------------------------------------------------------------------------------------------------------------------------------------------------------------------------------------------------------------------------------------------------------------|
|                                                 | Not excluded based on PA or SB                                                                                                                                                                                                                 |                                                                                |                                                                                                                                                                                                                                               |                                                                                                      |                                                                                                                                                                                                                              |                                                                         |                                                                                            |                                                       |                                                                                                                                                                                                                                                                                                                                                                                                                                                                                                                                                                                                                                                                                                                                                                           |
| Maier [57], 2016, US                            | Qualitative Pre-post design, N= 100, age = 74<br><br>Eligibility = >60 years and sitting 8 hours/day or more on average                                                                                                                        | Community dwelling older adults, 14-day intervention                           | Using a dual process model of motivation, determine the variables associated with between group and individual factors associated with SB in older adults by asking participants questions about their motivation at beginning and end of day | Activity monitoring (Accelerometer)<br>Education<br>Answer daily questionnaires                      | Instruction Information (Written material)<br>Self-monitoring (accelerometer)<br>Habit formation                                                                                                                             | Face to face individual and self-administered                           | Dual-process theories of motivation;<br>Health Action Process Approach (HAPA); Habit model | Active Pal accelerometer SBQ (9-item)                 | Positive: SB WAS: (a) Negatively associated with planning to reduce SB at the within-person level ( $\gamma_{10} = -0.51, p = .005$ ) (b) Positively associated with SB habit strength ( $\gamma_{02} = 19.97, p = .04$ ) PLANS TO LIMIT SB WERE: (a) Positively associated with task self-efficacy at the within-person level (b) Negatively associated at the between-person level (c) Positively associated with intentions at the between- and within-person level. INTENTIONS TO LIMIT SEDENTARY BEHAVIOUR WERE: (a) Positively associated with task self-efficacy at the between and within person level (b) Not associated with light-intensity physical activity outcome expectations, sedentary behavior risk perceptions, or sedentary behavior habit strength. |
| Gardner [59], 2014, London UK Original Protocol | Protocol, RCT, N=NA, age = 60 – 74 years (retired) and inactive ( $\leq 30$ consecutive minutes of leisure time physical activity of $\geq 3$ metabolic equivalents per week) - sedentary ( $\geq 6$ total leisure time hours sitting per day) | Community dwelling older adults from primary care setting, 8-week intervention | To assess the feasibility of the “On your feet earn your seat” intervention and determine the effectiveness of improving sedentary behaviour habits through replacing SB with PA                                                              | Education<br>Activity monitoring                                                                     | Instruction Information on health consequences, Motivational text prompts, goal setting, self-monitoring of sedentary time (accelerometer and tick sheet), habit formation, habit reversal social support from research team | written material booklet (self-administered) telephone                  | Habit formation model                                                                      | IPAQ SBQ<br>ActivePal 3 (7 days)                      | Protocol                                                                                                                                                                                                                                                                                                                                                                                                                                                                                                                                                                                                                                                                                                                                                                  |
| Gine-Garriga [44], 2017, Barcelona              | Protocol RCT (3 armed trial), target = 446, age = 65 and older<br><br>Eligibility: insufficiently active                                                                                                                                       | Community dwelling older adults, 16-week intervention                          | To evaluate the SITLESS Project, which aims to compare exercise referrals (ERS) to ERS + SMS to control on changes with PA and SB outcomes                                                                                                    | Physical Activity (weekly multi-component MVPA exercise program)<br>Education<br>Activity Monitoring | Instruction Information (Written materials)<br>Goal setting<br>Motivational coaching<br>Self-monitoring (Pedometer and diaries)                                                                                              | Group based<br>One to one<br>face to face<br>phone calls<br>Independent | SCT                                                                                        | Actigraph and Active Pal accelerometer<br>PACE<br>SBQ | Protocol                                                                                                                                                                                                                                                                                                                                                                                                                                                                                                                                                                                                                                                                                                                                                                  |
| Krehbiel [60], 2017, US                         | Protocol – RCT,<br><br>Eligibility: >60 years, not                                                                                                                                                                                             | Community dwelling, 8-week intervention                                        | Pilot study to evaluate feasibility of wear able technology to                                                                                                                                                                                | Physical Activity (multi-component structured exercise program)<br>Activity monitor                  | Self-monitoring (Fitbit feedback)<br>Goal setting<br>Motivational interviewing<br>Coaching                                                                                                                                   | Face to face group exercise program and face to face individual and     | Not reported                                                                               | Fit bit activity monitor                              | Protocol                                                                                                                                                                                                                                                                                                                                                                                                                                                                                                                                                                                                                                                                                                                                                                  |

|                                          |                                                                                                                                                |                                                                                                   |                                                                                                                                                                         |                                                                                                                                                                 |                                                                                                                                                                                            |                                                |                                                   |                                                                                                           |          |
|------------------------------------------|------------------------------------------------------------------------------------------------------------------------------------------------|---------------------------------------------------------------------------------------------------|-------------------------------------------------------------------------------------------------------------------------------------------------------------------------|-----------------------------------------------------------------------------------------------------------------------------------------------------------------|--------------------------------------------------------------------------------------------------------------------------------------------------------------------------------------------|------------------------------------------------|---------------------------------------------------|-----------------------------------------------------------------------------------------------------------|----------|
|                                          | excluded based on PA or SB                                                                                                                     |                                                                                                   | decrease SB in older adults                                                                                                                                             |                                                                                                                                                                 | counselling<br>Barrier identification/<br>Problem solving                                                                                                                                  | self-administered                              |                                                   |                                                                                                           |          |
| MacMillan [61], 2011, Scotland           | Protocol, RCT, waitlist control, N=? age = 65 and older and not meeting the PA guidelines                                                      | Community dwelling older adults recruited through primary care, 24 week intervention              | To examine the effectiveness of a walking program on PA outcome and behaviour change for older adults pedometer                                                         | Education<br>Physical activity (peer support walking groups)<br>Exercise program                                                                                | Instruction<br>Information (Written educational material)<br>Motivational interviewing consultations<br>Goal setting<br>Graded tasks (tailored weekly step # goals based on initial steps) | One on one consultation and group face to face | Transtheoretical model of change, SCT, Re-AIM     | ActivPal<br>Focus Groups                                                                                  | Protocol |
| Martin-Borras [33], 2014, Spain          | Protocol, RCT, N= ?, ages 25 – 65, 2 phases<br><br>Eligibility: >6 hours/day sitting                                                           | Community adults who are overweight/ mild obese recruited from primary care, 6-month intervention | To evaluate the effectiveness of an education-based intervention (designed for the individuals stage of change) on sedentary behaviour outcomes                         | Education (SEDESTACTIVEBehaviour change Intervention developed based on qualitative data from first phases (1 = focus groups, interviews, 2 = RCT intervention) | Instruction<br>Information<br>Goal setting<br>Health coaching                                                                                                                              | Face to face visits, phone calls               | Prochaska and DiClemente's Stages of Change Model | Activ Pal accelerometer, Marshall Questionnaire, Occupational Sitting and Physical Activity Questionnaire | Protocol |
| Rose [34], 2007, New Zealand             | Protocol RCT, N= 880, age 40 – 74 years old women undertaking less than 150 minutes of at least moderate intensity physical activity per week. | Community dwelling adults recruited from primary care, 9 month intervention                       | To determine effectiveness of nurse-led intervention to increase physical activity in physically inactive women recruited from primary care.                            | Lifestyle script: Physical Activity (walking program) prescribed by exercise specialist<br>Education                                                            | Motivational interviewing<br>Counselling<br>Information<br>Goal setting                                                                                                                    | Face to face<br>Self-administered              | NA                                                | New Zealand Physical activity questionnaire                                                               | Protocol |
| Brickwood [58], 2017, Australia          | Protocol, RCT 3 arms N=?, age = over 60 and frail<br>No excluded based on SB or PA                                                             | Community dwelling adults > 60 years, 12-month intervention                                       | To compare PA levels compliance between usual care exercise group to PA activity tracker group to telephone counselling group following a 12-week strengthening program | Physical activity<br>Activity monitoring                                                                                                                        | Remote physical activity monitoring and feedback (RAMF), problem solving, counselling information                                                                                          | Web-based telephone                            | Not reported                                      | Active Pal accelerometer<br>Active Australia Questionnaire                                                | Protocol |
| Thogersen-Ntoumani [38], 2017, Australia | Protocol, Pilot RCT<br><br>Eligibility = 60 years and older                                                                                    | Retirement villages                                                                               | To assess the feasibility, preliminary effects on changes in PA                                                                                                         | Physical activity (walking program)<br>Workshops<br>Education                                                                                                   | Instruction<br>Information (benefits of PA, risks of SB, strategies to                                                                                                                     | Face to face group<br>Self-administered books  | Self-determination theory                         | Pedometers<br>Log books<br>Sedentary time for older adults questionnaire                                  | Protocol |



|                            |                                                                                                                                        |                                          |                                                                                                                 |                                                                                                |                                                                                                                                                       |                                      |    |                          |          |
|----------------------------|----------------------------------------------------------------------------------------------------------------------------------------|------------------------------------------|-----------------------------------------------------------------------------------------------------------------|------------------------------------------------------------------------------------------------|-------------------------------------------------------------------------------------------------------------------------------------------------------|--------------------------------------|----|--------------------------|----------|
|                            | who do not meet the PA guidelines                                                                                                      |                                          | and SB of an intervention aimed to have resident ambassadors lead a walking program for older adults.           |                                                                                                | decrease SB), motivational interviewing, goal setting, barrier identification/ problem solving, self-monitoring (tick sheets), peer support           |                                      |    |                          |          |
| Tudor-Locke [35], 2014, US | Protocol, N=120?, age = 45 – 75 post-menopausal women with objectively determined sedentary: Average ≤5,000 steps/day during screening | Community-dwelling post-menopausal women | To compare the impact of 2 pedometer-based walking interventions relative to a control group on health outcomes | Physical activity (community walking program)<br>Activity monitoring (Pedometers)<br>Education | Instruction<br>Information<br>Goals setting<br>Problem solving<br>Self-monitoring (pedometer)<br>Peer support<br>Comparative norms<br>Action Planning | Face to face<br>Group and individual | NA | Acti-graph Accelerometer | Protocol |
